# Supplementary material for: 3dRNAscore: a distance and torsion angle dependent evaluation function of 3D RNA structures
Source: PubMed Central journal article supplement (PMC4446410; doi:10.1093/nar/gkv141), 2015-02-24

Supplementary material for  
3dRNAscore: a distance and torsion angle dependent  
evaluation function of three-dimensional RNA structures

Jian Wang\*, Yunjie Zhao\*, Chunyan Zhu and Yi Xiao†

*Biomolecular Physics and Modeling Group, Department of Physics and Key  
Laboratory of Molecular Biophysics of the Ministry of Education, Huazhong  
University of Science and Technology, Wuhan 430074, Hubei, China*

\*These authors made equal contributions.

†Corresponding author (email: yxiao@hust.edu.cn).

## Contents

|          |                                                                                                            |           |
|----------|------------------------------------------------------------------------------------------------------------|-----------|
| <b>1</b> | <b>Comparison of the performance of 3dRNAScore, KB potential, RASP, and Rosetta methods in test set II</b> | <b>3</b>  |
| <b>2</b> | <b>Energy-RMSD plots of the results in test set II</b>                                                     | <b>5</b>  |
| <b>3</b> | <b>Energy-DI plots of the results in test set II</b>                                                       | <b>7</b>  |
| <b>4</b> | <b>Energy-INF<sub>all</sub> plots of the results in test set II</b>                                        | <b>9</b>  |
| <b>5</b> | <b>Energy-INF<sub>wc</sub> plots of the results in test set II</b>                                         | <b>11</b> |
| <b>6</b> | <b>Energy-INF<sub>stack</sub> plots of the results in test set II</b>                                      | <b>13</b> |

# 1 Comparison of the performance of 3dRNAscore, KB potential, RASP, and Rosetta methods in test set II

| Decoy                                     | RNA  | Length | Method | ES(RMSD)       |                |                |                | ES(DI) |     |     |     | ES(INF <sub>all</sub> ) |     |     |     | ES(INF <sub>wc</sub> ) |     |     |     | ES(INF <sub>stack</sub> ) |     |     |     |
|-------------------------------------------|------|--------|--------|----------------|----------------|----------------|----------------|--------|-----|-----|-----|-------------------------|-----|-----|-----|------------------------|-----|-----|-----|---------------------------|-----|-----|-----|
|                                           |      |        |        | D <sup>1</sup> | K <sup>2</sup> | R <sup>3</sup> | S <sup>4</sup> | D      | K   | R   | S   | D                       | K   | R   | S   | D                      | K   | R   | S   | D                         | K   | R   | S   |
| Position restrained dynamics and REMD (A) | 1duq | 26     | X-ray  | 8.5            | 7.6            | 7.6            | 7.1            | 8.3    | 7.5 | 7.6 | 7   | 9.4                     | 8.5 | 8.3 | 7.1 | 9                      | 8.3 | 8   | 6.9 | 8.7                       | 7.8 | 8   | 6.9 |
|                                           | 1f27 | 30     | X-ray  | 8.3            | 7.9            | 6.6            | 6.2            | 8.1    | 7.8 | 6.6 | 6.2 | 8.2                     | 7.9 | 8.2 | 6.3 | 8.2                    | 7.9 | 7.8 | 6.1 | 7.6                       | 7.8 | 7.9 | 5.9 |
|                                           | 1msy | 27     | X-ray  | 7.5            | 5.7            | 5.7            | 3.6            | 7.6    | 6   | 5.6 | 3.5 | 6.8                     | 7.3 | 6.7 | 3.7 | 4                      | 3.8 | 3.8 | 2.4 | 6.3                       | 5.6 | 5.8 | 3.4 |
|                                           | 1nuj | 24     | X-ray  | 7.7            | 7.3            | 5.2            | 6.9            | 7.4    | 7.2 | 5.2 | 6.7 | 8.5                     | 7.7 | 7.7 | 6.4 | 8.8                    | 7.3 | 6.5 | 5.3 | 7.1                       | 7.3 | 7.7 | 6.4 |
|                                           | 434d | 14     | X-ray  | 8              | 7.7            | 7              | 6.8            | 7.6    | 7.7 | 6.9 | 6.8 | 8.7                     | 8.1 | 8.5 | 6.9 | 8.7                    | 8.5 | 8.2 | 6.5 | 8.4                       | 7.2 | 7.4 | 6.3 |
| Normal modes (B)                          | 1duq | 26     | X-ray  | 7.5            | 7              | 5.7            | 3.8            | 6.9    | 7   | 5.7 | 3.5 | 2.4                     | 2.3 | 2.9 | 3.8 | 4.3                    | 2.9 | 3.3 | 3.8 | 3.7                       | 3.7 | 3.7 | 4.3 |
|                                           | 1esy | 19     | NMR    | 4.9            | 5.4            | 4.5            | 5.6            | 6.5    | 5.5 | 4.7 | 5.7 | 2.6                     | 1.5 | 2.4 | 1.8 | 0.7                    | 0.2 | 0.4 | 0.2 | 2.2                       | 1.8 | 2   | 1.5 |
|                                           | 1f27 | 30     | X-ray  | 5.9            | 5.8            | 3.7            | 2.6            | 6.7    | 5.8 | 3.7 | 2.5 | 3.9                     | 3.4 | 2.9 | 2.3 | 3.3                    | 2.9 | 2.2 | 1.7 | 4                         | 2.6 | 3.7 | 2.8 |
|                                           | 1i9v | 76     | X-ray  | 6.1            | 2.6            | 5.3            | 3              | 5.5    | 2.7 | 5.1 | 3   | 5.5                     | 5.1 | 4.7 | 2.8 | 5.7                    | 3.9 | 4.1 | 2.5 | 3.6                       | 2.9 | 3.3 | 1.9 |
|                                           | 1kka | 17     | NMR    | 5.7            | 4.6            | 4.1            | 4.6            | 6.9    | 4.3 | 4.1 | 4.8 | 3.5                     | 2.9 | 2.9 | 3.2 | 0.3                    | 0.2 | 0.2 | 0.3 | 3.2                       | 2.5 | 2.2 | 2.8 |
|                                           | 1msy | 27     | X-ray  | 5.9            | 5.6            | 2.2            | 4.6            | 6.7    | 5.4 | 2.7 | 4.5 | 4.2                     | 3.3 | 3.7 | 3.3 | 0.4                    | 0.5 | 1   | 0.8 | 3.6                       | 2.3 | 3.5 | 3.3 |
|                                           | 1nuj | 24     | X-ray  | 7.1            | 7.4            | 5.9            | 2.4            | 4.5    | 7   | 5.9 | 2.2 | 3.5                     | 3.2 | 3.3 | 2.1 | 4.1                    | 3.2 | 3.9 | 3.2 | 3.3                       | 2.2 | 2.4 | 1.9 |
|                                           | 1qwa | 21     | NMR    | 3.5            | 3.2            | 2              | 3.8            | 3.7    | 3.3 | 2.2 | 3.9 | 3.1                     | 2.1 | 2.6 | 2.7 | 2.9                    | 2.3 | 2.6 | 2.7 | 2.7                       | 1.4 | 1.8 | 2.2 |
|                                           | 1x9k | 62     | X-ray  | 6.7            | 1.6            | 5.2            | 3              | 3.1    | 1.9 | 5.2 | 2.8 | 5.6                     | 4.9 | 4.6 | 2.8 | 5                      | 4.9 | 4.6 | 2.6 | 5                         | 4.8 | 4   | 2.5 |
|                                           | 1xjr | 46     | X-ray  | 7.7            | 5.4            | 7.9            | 2.2            | 6.2    | 5   | 7.9 | 2.5 | 6                       | 5.2 | 5.4 | 2.3 | 4.4                    | 4.3 | 4.8 | 1.8 | 5.2                       | 3.9 | 4.6 | 2.1 |
|                                           | 1ykq | 19     | X-ray  | 4.6            | 3.4            | 3.5            | 2.8            | 5      | 3.3 | 3.8 | 2.5 | 6                       | 5.5 | 4.8 | 2.4 | 5                      | 3.8 | 3.7 | 2.6 | 4.4                       | 4.3 | 4.1 | 1.7 |
|                                           | 1zih | 12     | NMR    | 7.7            | 5.4            | 5.7            | 6.6            | 6.9    | 5.3 | 5.7 | 6.5 | 2.6                     | 2.6 | 2.6 | 2.3 | 0                      | 0   | 0   | 0   | 3.4                       | 3.8 | 3.5 | 3.3 |
|                                           | 28sp | 28     | NMR    | 5.7            | 4              | 6.5            | 1.8            | 5.7    | 4.5 | 6.7 | 2.9 | 5.7                     | 5.2 | 4.9 | 2.5 | 3.3                    | 2.7 | 2.6 | 1.2 | 3.9                       | 3.3 | 4.7 | 2.4 |
|                                           | 2f88 | 34     | NMR    | 6.8            | 5.4            | 4.9            | 4.4            | 4.1    | 5.4 | 4.7 | 4.2 | 4.1                     | 4   | 4.1 | 3.2 | 5.7                    | 5.1 | 4.9 | 3.3 | 3.1                       | 1.8 | 2.3 | 1.8 |
|                                           | 434d | 14     | X-ray  | 7.7            | 7.4            | 7.4            | 5.2            | 6.9    | 7.4 | 7.6 | 5.2 | 4.3                     | 3.8 | 3.5 | 3.6 | 3.9                    | 2.9 | 2.6 | 2.7 | 4.3                       | 3.4 | 3.5 | 3.6 |
| FARNA (C)                                 | 1a4d | 41     | NMR    | 2.4            | 3.8            | 2              | 0.8            | 2.1    | 4   | 2   | 0.7 | 3                       | 3.2 | 3   | 0.4 | 1.8                    | 1.3 | 1.2 | 0.2 | 3.4                       | 2   | 2   | 0.4 |
|                                           | 1csl | 28     | X-ray  | 2              | 1.5            | 1.6            | 1.3            | 2.4    | 1.4 | 1.6 | 1.4 | 2.4                     | 2.7 | 3.2 | 1.3 | 2                      | 2.7 | 2.4 | 0.8 | 2.4                       | 2.5 | 2.6 | 1.1 |
|                                           | 1dqf | 19     | X-ray  | 4.2            | 1.8            | 2.8            | 1              | 3.6    | 2   | 3.2 | 1   | 2.4                     | 3.4 | 3.2 | 1   | 3                      | 2.1 | 2.6 | 0.9 | 2.8                       | 3   | 3   | 0.9 |
|                                           | 1esy | 19     | NMR    | 3.2            | 3.7            | 4.8            | 1.2            | 3.8    | 3.5 | 4.2 | 1.1 | 3.4                     | 2.5 | 2.2 | 1.3 | 4.2                    | 3.2 | 1.8 | 1.1 | 2.8                       | 1.7 | 2.6 | 1.5 |
|                                           | 1i9x | 26     | X-ray  | 3.4            | 1.3            | 2.2            | 1.5            | 4      | 1.5 | 3.6 | 1.6 | 3                       | 2.8 | 2.2 | 1.7 | 3                      | 2.5 | 2.4 | 1.7 | 2                         | 2   | 2   | 1.6 |
|                                           | 1j6s | 24     | X-ray  | 0.2            | 1.4            | 0.2            | 0.6            | 1.6    | 1.7 | 0.8 | 0.5 | 3.4                     | 3.1 | 3   | 0.5 | 1.2                    | 0.9 | 0.6 | 0.4 | 4.8                       | 4.3 | 4   | 1   |
|                                           | 1kd5 | 22     | X-ray  | 3.2            | 0.3            | 0.8            | 0.2            | 2.4    | 0.5 | 1.6 | 0.3 | 2.6                     | 2.9 | 2.6 | 0.2 | 2                      | 1.2 | 1.6 | 0.3 | 4.2                       | 3.3 | 3.8 | 0.8 |
|                                           | 1kka | 17     | NMR    | 1.4            | 1.2            | 0.6            | 0.6            | 2      | 0.8 | 0.8 | 0.6 | 3                       | 2.5 | 3.4 | 2.1 | 3.4                    | 2.7 | 1.8 | 1.4 | 2.8                       | 2.8 | 3   | 1.8 |
|                                           | 1l2x | 27     | X-ray  | 0.6            | 3.2            | 1              | 1.8            | 1.5    | 3.2 | 1.2 | 1.8 | 2.4                     | 2   | 1.8 | 1.8 | 0.4                    | 0.1 | 0   | 0.3 | 3                         | 2.4 | 2.2 | 1.8 |
|                                           | 1mhk | 32     | X-ray  | 1.6            | 1.2            | 1.6            | 1              | 1.4    | 1.2 | 1.4 | 1.2 | 2.6                     | 1.9 | 2.2 | 1.2 | 2.2                    | 2.5 | 2.6 | 1.2 | 2                         | 1.7 | 1.8 | 1.2 |
|                                           | 1q9a | 27     | X-ray  | 2.6            | 0.5            | 0.8            | 0.8            | 3.2    | 0.5 | 1.2 | 0.8 | 2                       | 1.8 | 1.6 | 0.8 | 0.8                    | 1   | 1   | 0.6 | 3.8                       | 3.1 | 3.2 | 1.5 |
|                                           | 1qwa | 21     | NMR    | 2.2            | 1.2            | 0.4            | 1              | 1.4    | 1.3 | 0.6 | 1   | 2.4                     | 2.7 | 2.6 | 1   | 1.8                    | 1.8 | 1.8 | 1.1 | 3.2                       | 2.9 | 2.6 | 1.1 |

| Decoy             | RNA  | Length | Method | ES(RMSD)       |                |                |                | ES(DI) |      |      |      | ES(INF <sub>all</sub> ) |      |      |      | ES(INF <sub>wc</sub> ) |      |      |      | ES(INF <sub>stack</sub> ) |      |      |      |
|-------------------|------|--------|--------|----------------|----------------|----------------|----------------|--------|------|------|------|-------------------------|------|------|------|------------------------|------|------|------|---------------------------|------|------|------|
|                   |      |        |        | D <sup>1</sup> | K <sup>2</sup> | R <sup>3</sup> | S <sup>4</sup> | D      | K    | R    | S    | D                       | K    | R    | S    | D                      | K    | R    | S    | D                         | K    | R    | S    |
|                   | 1xjr | 46     | X-ray  | 2.4            | 2              | 2.4            | 1.2            | 3.2    | 1.9  | 3.4  | 1    | 3.8                     | 4.2  | 4.4  | 1.2  | 2.2                    | 1.6  | 1.8  | 0.5  | 3.6                       | 3.6  | 3.6  | 0.9  |
|                   | 1zih | 12     | NMR    | 4.8            | 5              | 4.8            | 2              | 6.8    | 5.5  | 7.2  | 1.9  | 4.6                     | 2.1  | 1.6  | 2    | 3.6                    | 1.6  | 0.4  | 0.7  | 2.6                       | 2.8  | 3.8  | 2.9  |
|                   | 255d | 24     | X-ray  | 2.4            | 0.7            | 0.6            | 1.3            | 2      | 0.7  | 0.6  | 1.1  | 2.2                     | 2.3  | 1.8  | 1.2  | 1.8                    | 1.3  | 1    | 0.9  | 2                         | 1.4  | 1.4  | 1    |
|                   | 283d | 24     | X-ray  | 1.4            | 0.8            | 0.8            | 0.7            | 1.8    | 0.8  | 1    | 0.7  | 2.8                     | 2.5  | 3    | 0.8  | 2.6                    | 2.3  | 0.8  | 0.5  | 3.1                       | 2.7  | 2.8  | 0.7  |
|                   | 28sp | 28     | NMR    | 2.8            | 1.5            | 3              | 1.7            | 3.8    | 1.2  | 4.2  | 1.8  | 4.8                     | 3.9  | 4.2  | 1.6  | 3.2                    | 2.7  | 2.4  | 1.2  | 3.9                       | 2.9  | 3    | 1.3  |
|                   | 2a43 | 26     | X-ray  | 2.2            | 2              | 1.4            | 0.6            | 3.2    | 1.8  | 2    | 0.6  | 3                       | 3.4  | 2.8  | 0.5  | 2.2                    | 2.1  | 1.8  | 0.5  | 3.5                       | 3    | 3.2  | 0.7  |
|                   | 2f88 | 34     | NMR    | 3.2            | 1.3            | 2.2            | 1.3            | 3.6    | 1.3  | 1.6  | 1.2  | 2.6                     | 2.7  | 2.2  | 1.2  | 3.8                    | 2.3  | 1.8  | 0.8  | 2.7                       | 1.4  | 2.2  | 1.2  |
| AVERAGE<br>VALUES |      | A      |        | 8.00           | 7.24           | 6.42           | 6.12           | 7.80   | 7.24 | 6.38 | 6.04 | 8.32                    | 7.90 | 7.88 | 6.08 | 7.74                   | 7.16 | 6.86 | 5.44 | 7.62                      | 7.14 | 7.36 | 5.78 |
|                   |      | B      |        | 6.23           | 4.95           | 4.97           | 3.76           | 5.69   | 4.92 | 5.05 | 3.78 | 4.20                    | 3.67 | 3.69 | 2.74 | 3.27                   | 2.65 | 2.73 | 1.96 | 3.71                      | 2.98 | 3.29 | 2.54 |
|                   |      | C      |        | 2.43           | 1.81           | 1.79           | 1.08           | 2.83   | 1.83 | 2.22 | 1.07 | 2.97                    | 2.77 | 2.68 | 1.15 | 2.38                   | 1.89 | 1.57 | 0.79 | 3.08                      | 2.61 | 2.78 | 1.23 |
|                   |      | X-Ray  |        | 4.82           | 3.81           | 3.66           | 2.78           | 4.65   | 3.80 | 3.89 | 2.73 | 4.45                    | 4.20 | 4.12 | 2.62 | 3.78                   | 3.28 | 3.20 | 2.21 | 4.32                      | 3.80 | 3.97 | 2.55 |
|                   |      | NMR    |        | 4.18           | 3.52           | 3.50           | 2.72           | 4.41   | 3.53 | 3.75 | 2.79 | 3.49                    | 2.92 | 2.98 | 1.95 | 2.67                   | 2.01 | 1.68 | 1.09 | 3.07                      | 2.39 | 2.75 | 1.86 |
|                   |      | ALL    |        | 4.61           | 3.71           | 3.61           | 2.76           | 4.57   | 3.71 | 3.84 | 2.75 | 4.13                    | 3.77 | 3.74 | 2.39 | 3.41                   | 2.86 | 2.69 | 1.84 | 3.91                      | 3.33 | 3.56 | 2.32 |

<sup>1</sup>3dRNAscore

<sup>2</sup>KB

<sup>3</sup>RASP

<sup>4</sup>Rosetta

## 2 Energy-RMSD plots of the results in test set II

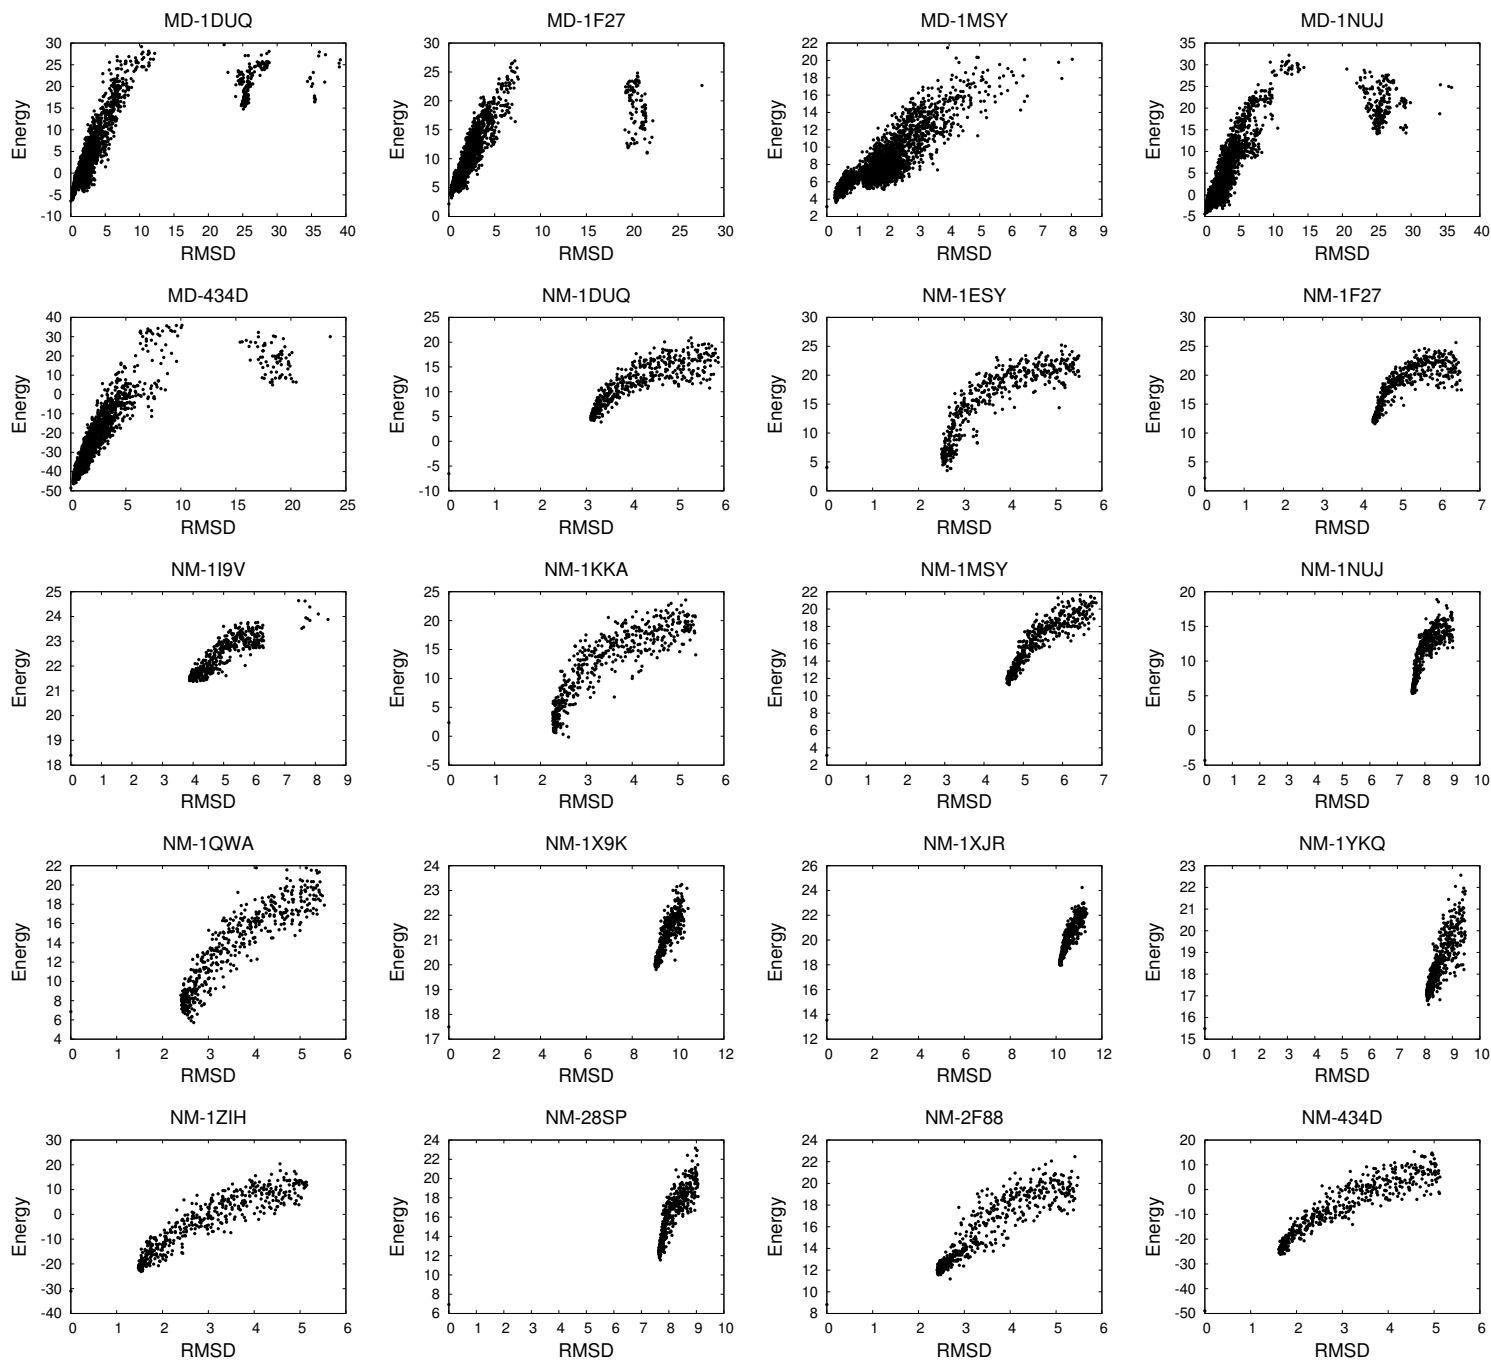

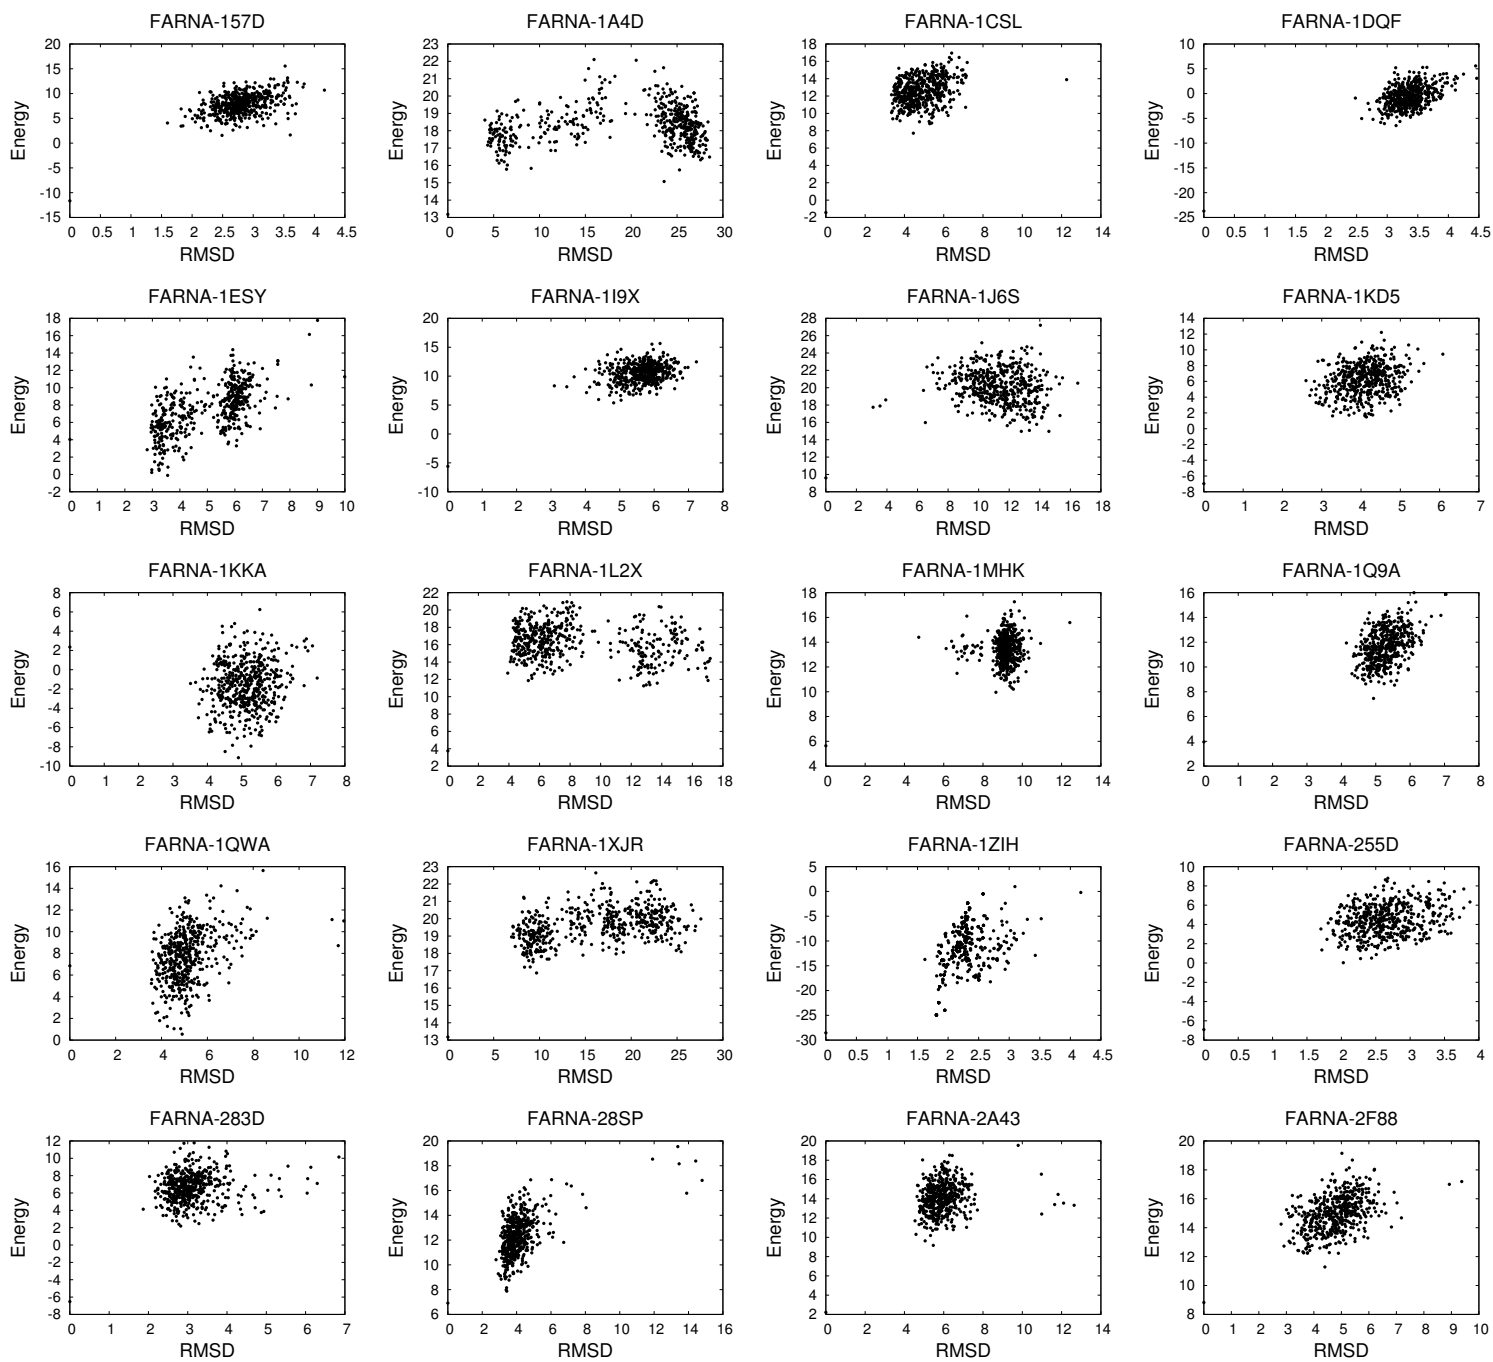

### 3 Energy-DI plots of the results in test set II

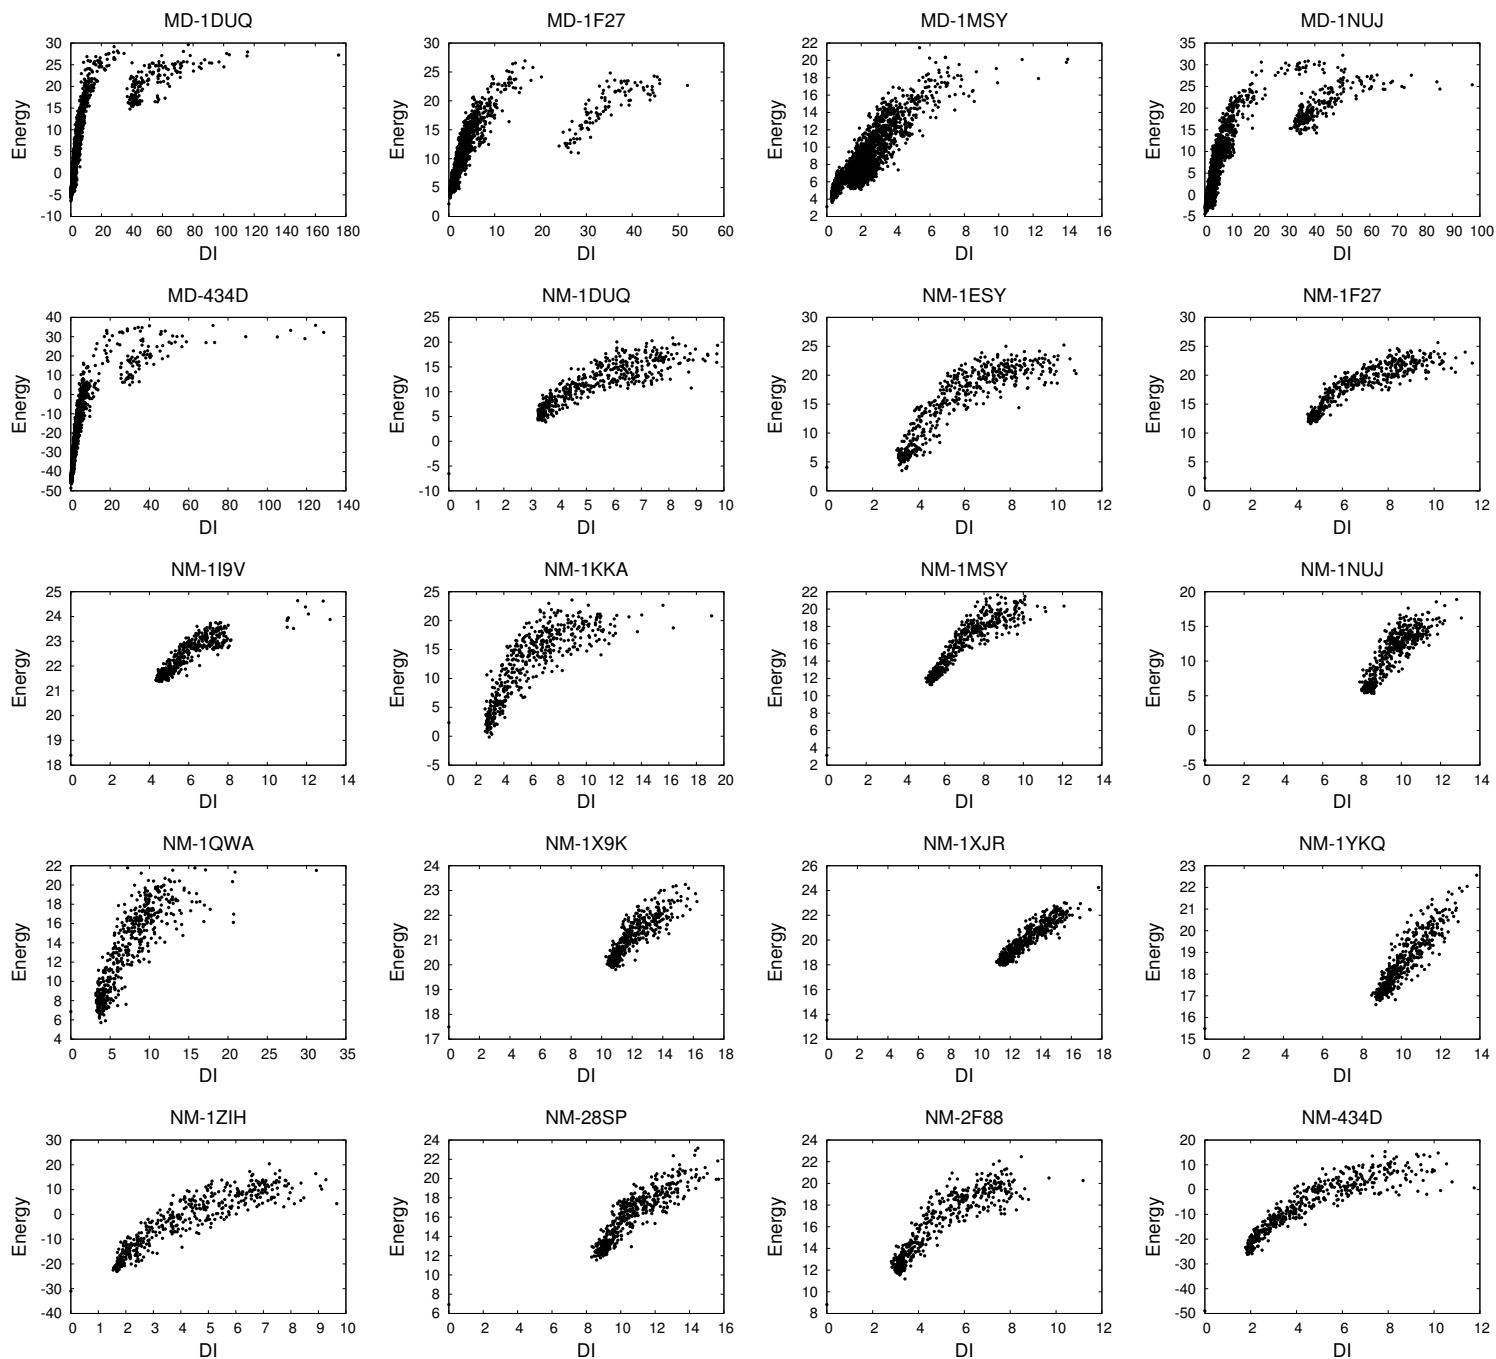

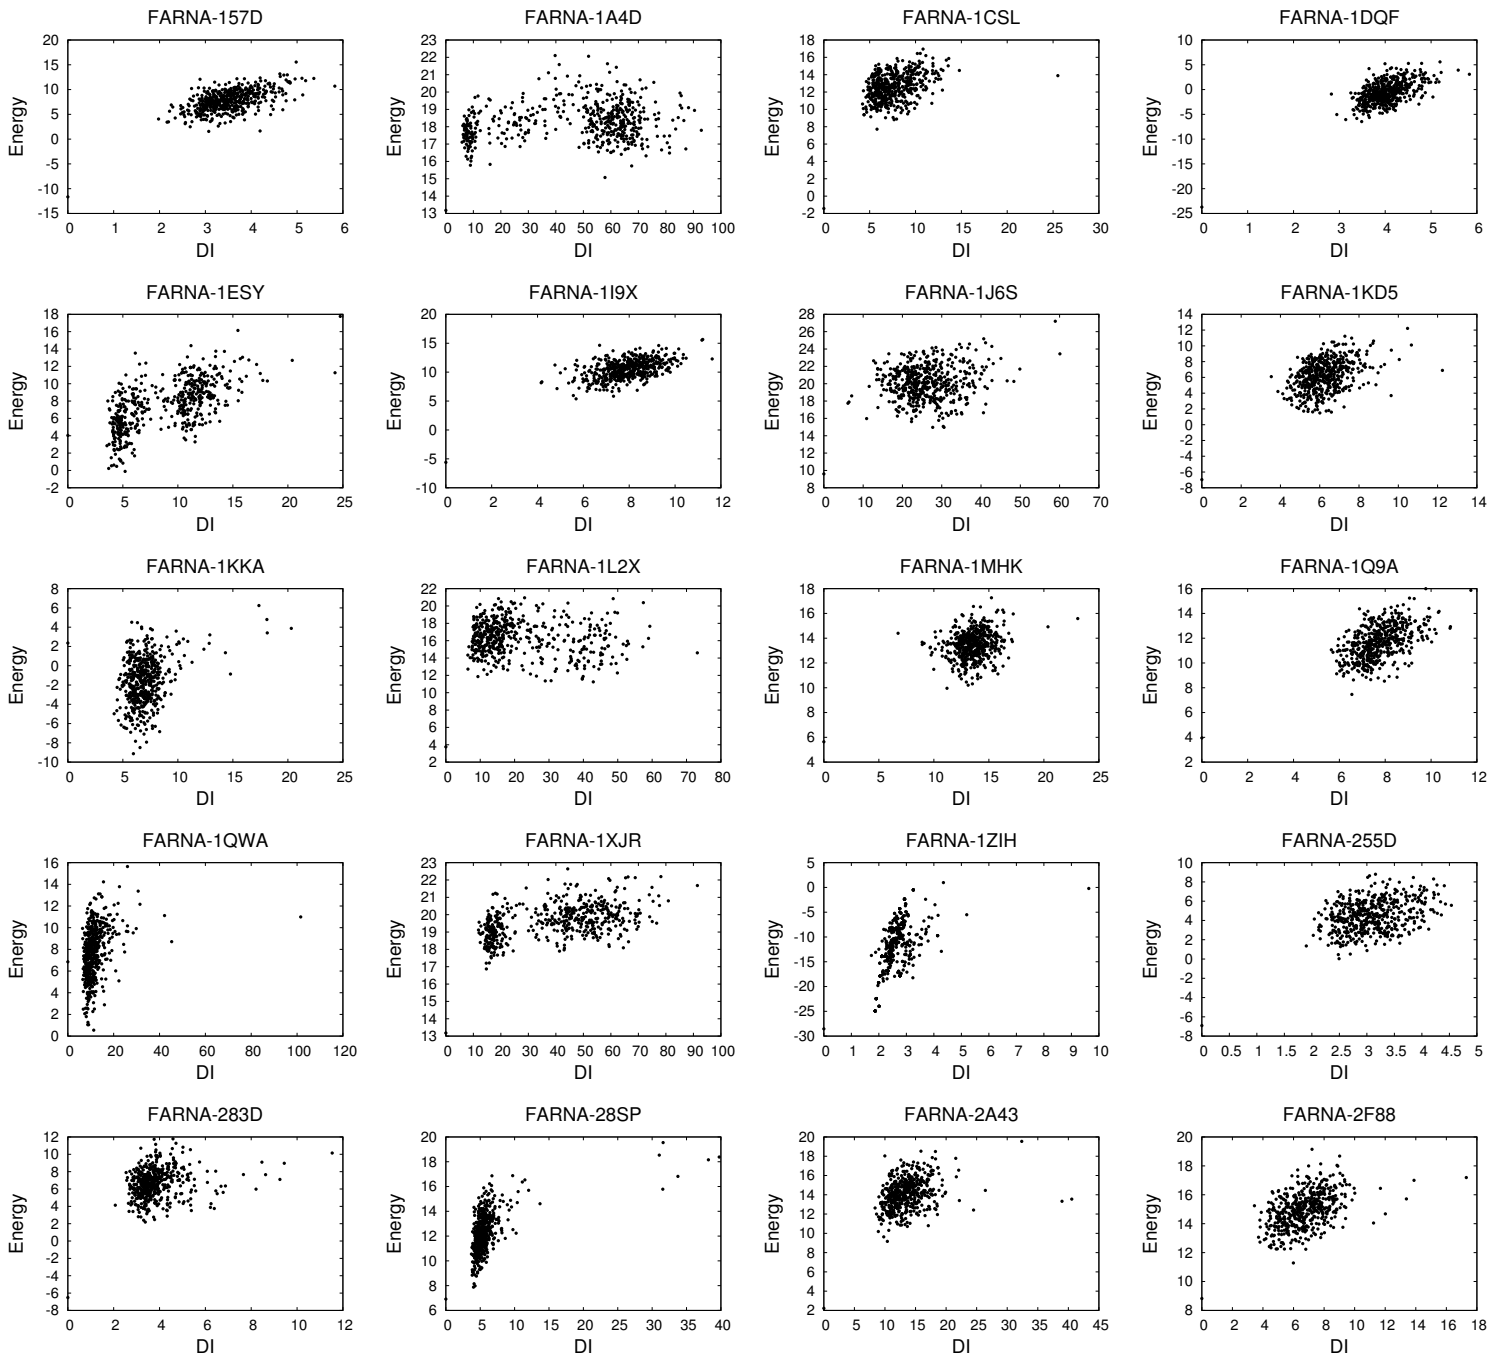



## 4 Energy- $INF_{all}$ plots of the results in test set II

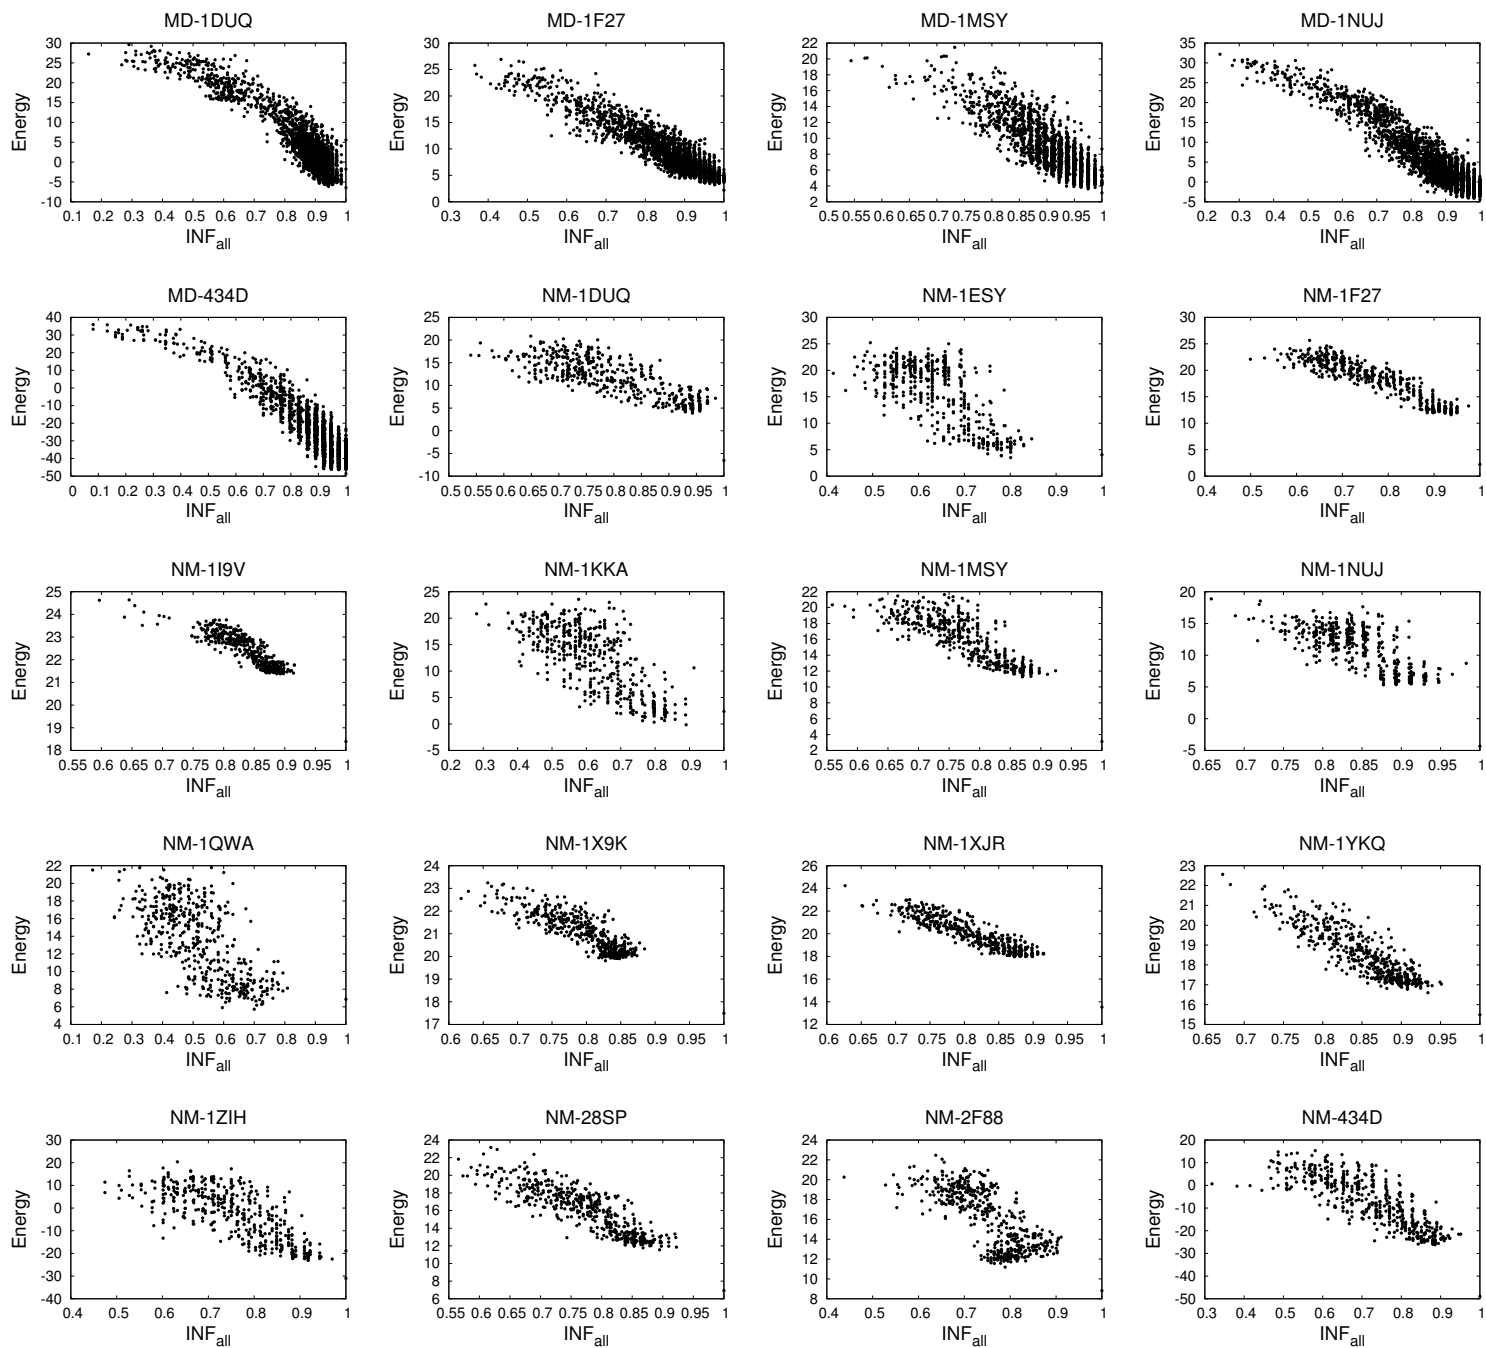

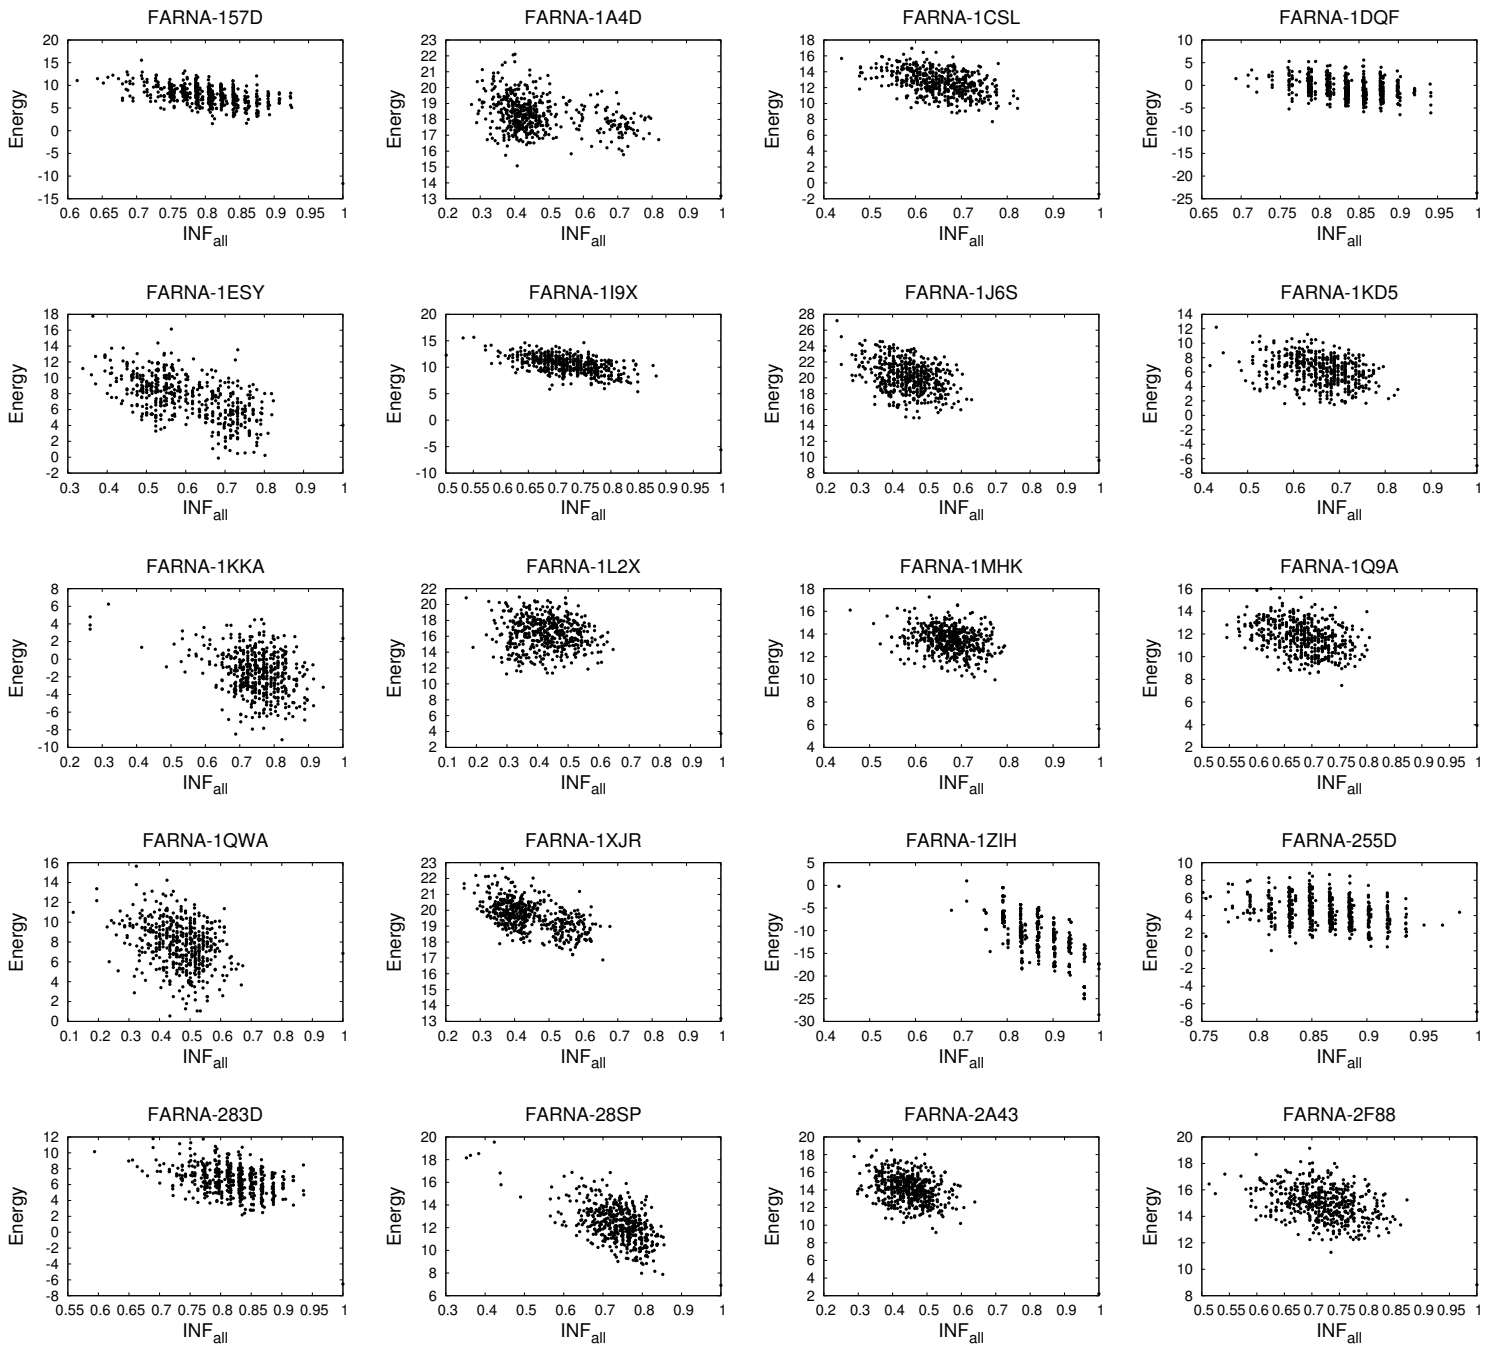

## 5 Energy- $\text{INF}_{wc}$ plots of the results in test set II

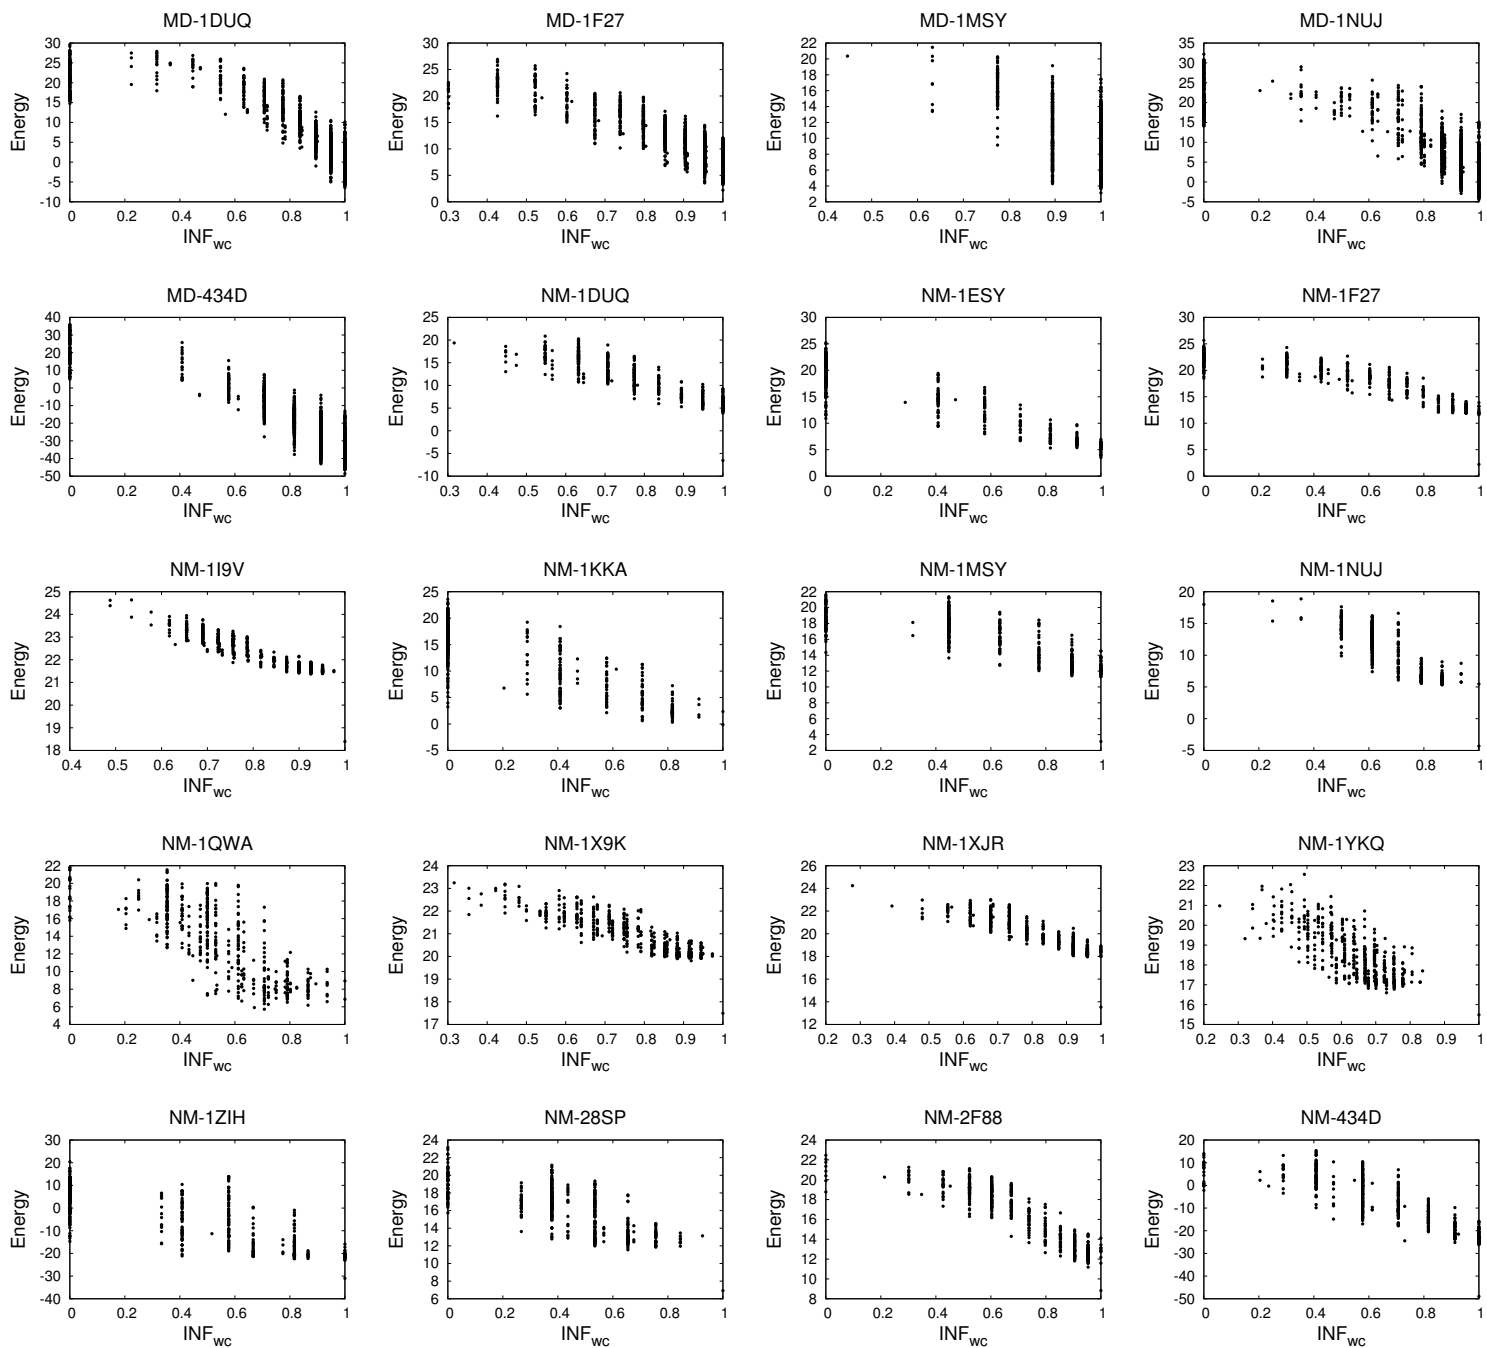

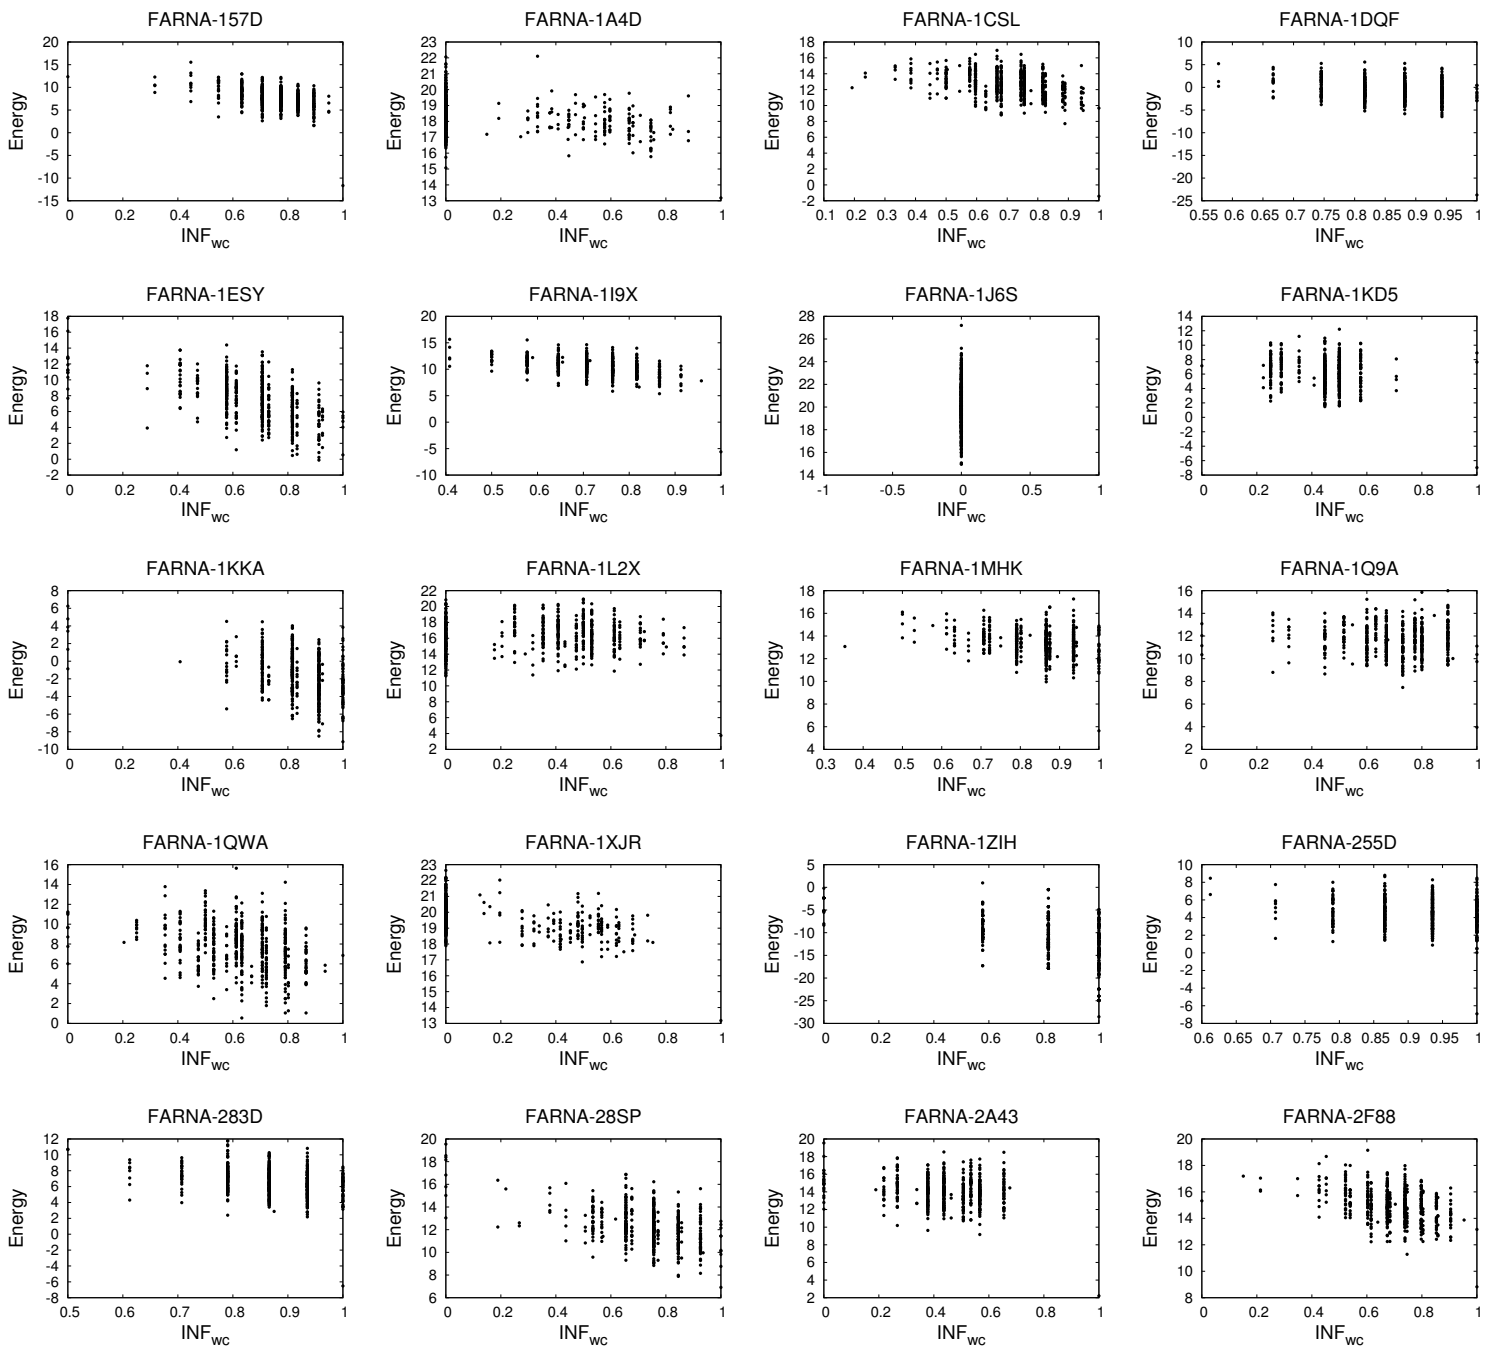

## 6 Energy- $\text{INF}_{\text{stack}}$ plots of the results in test set II

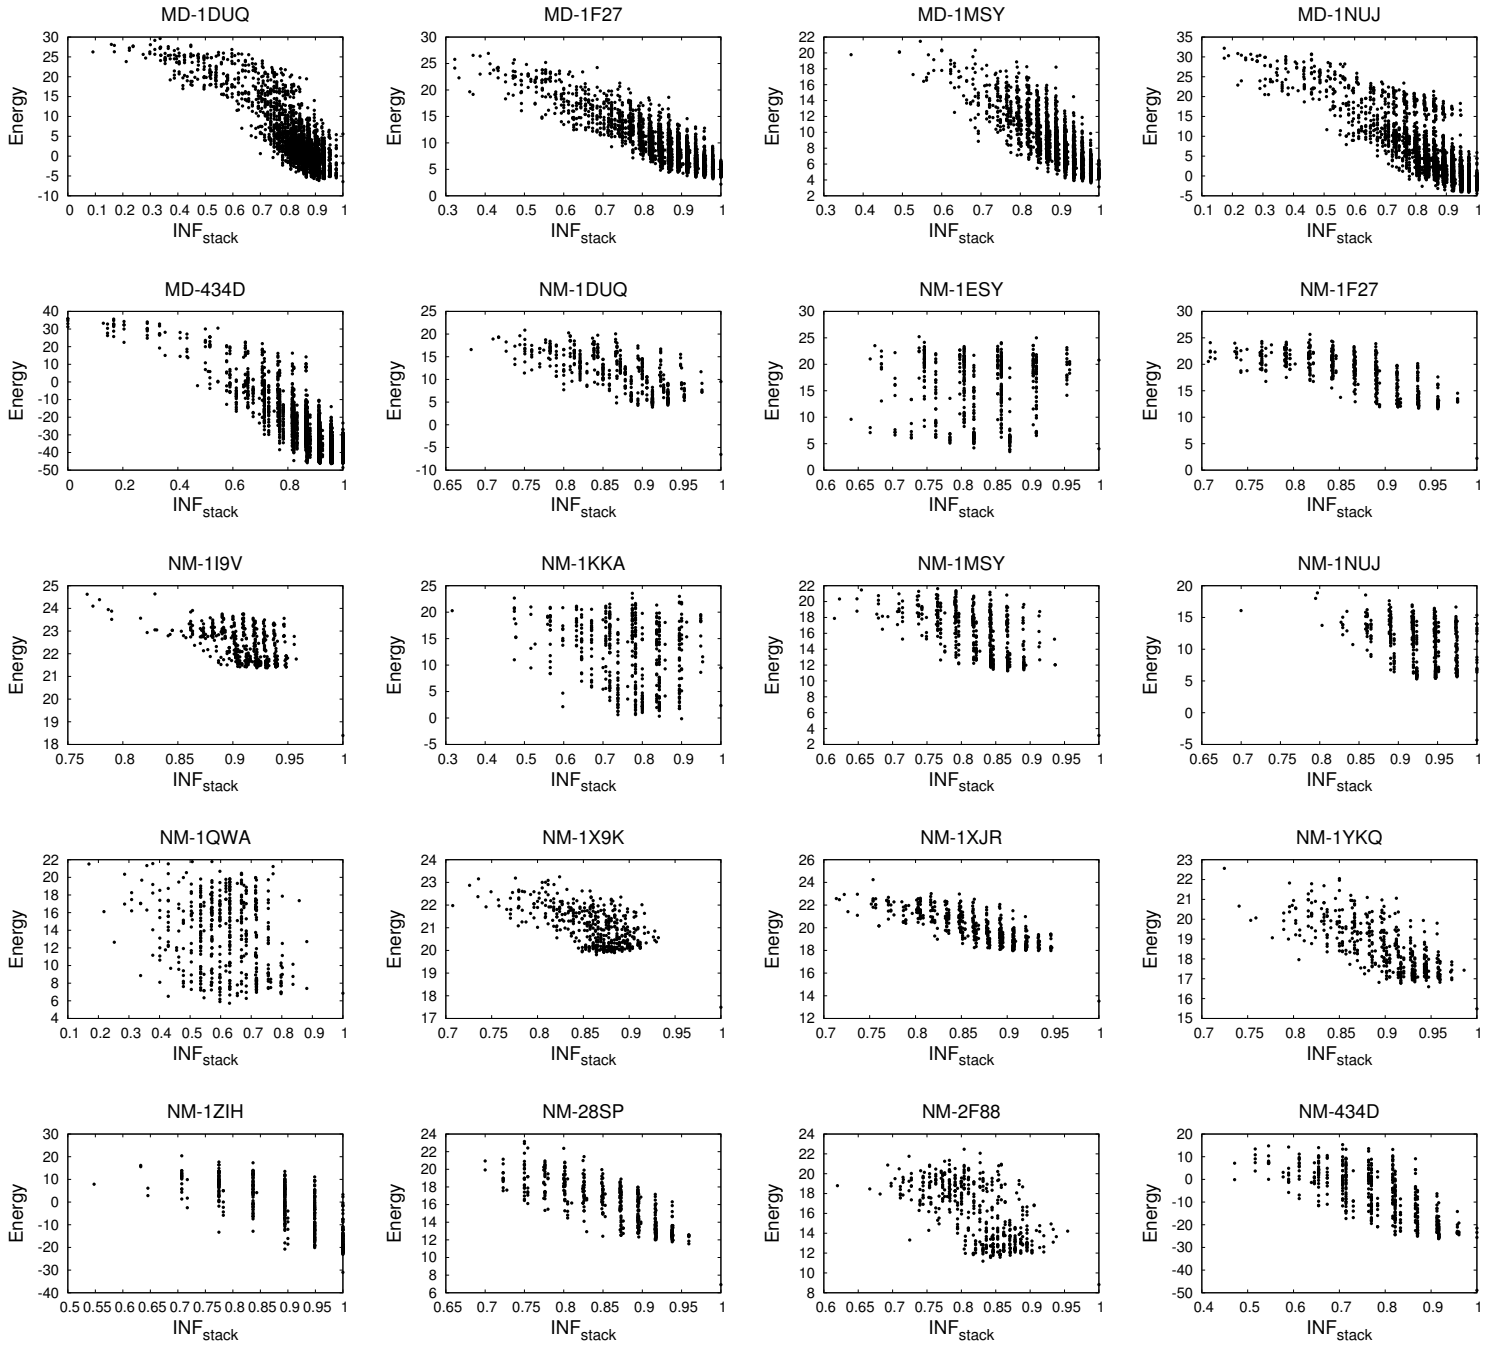

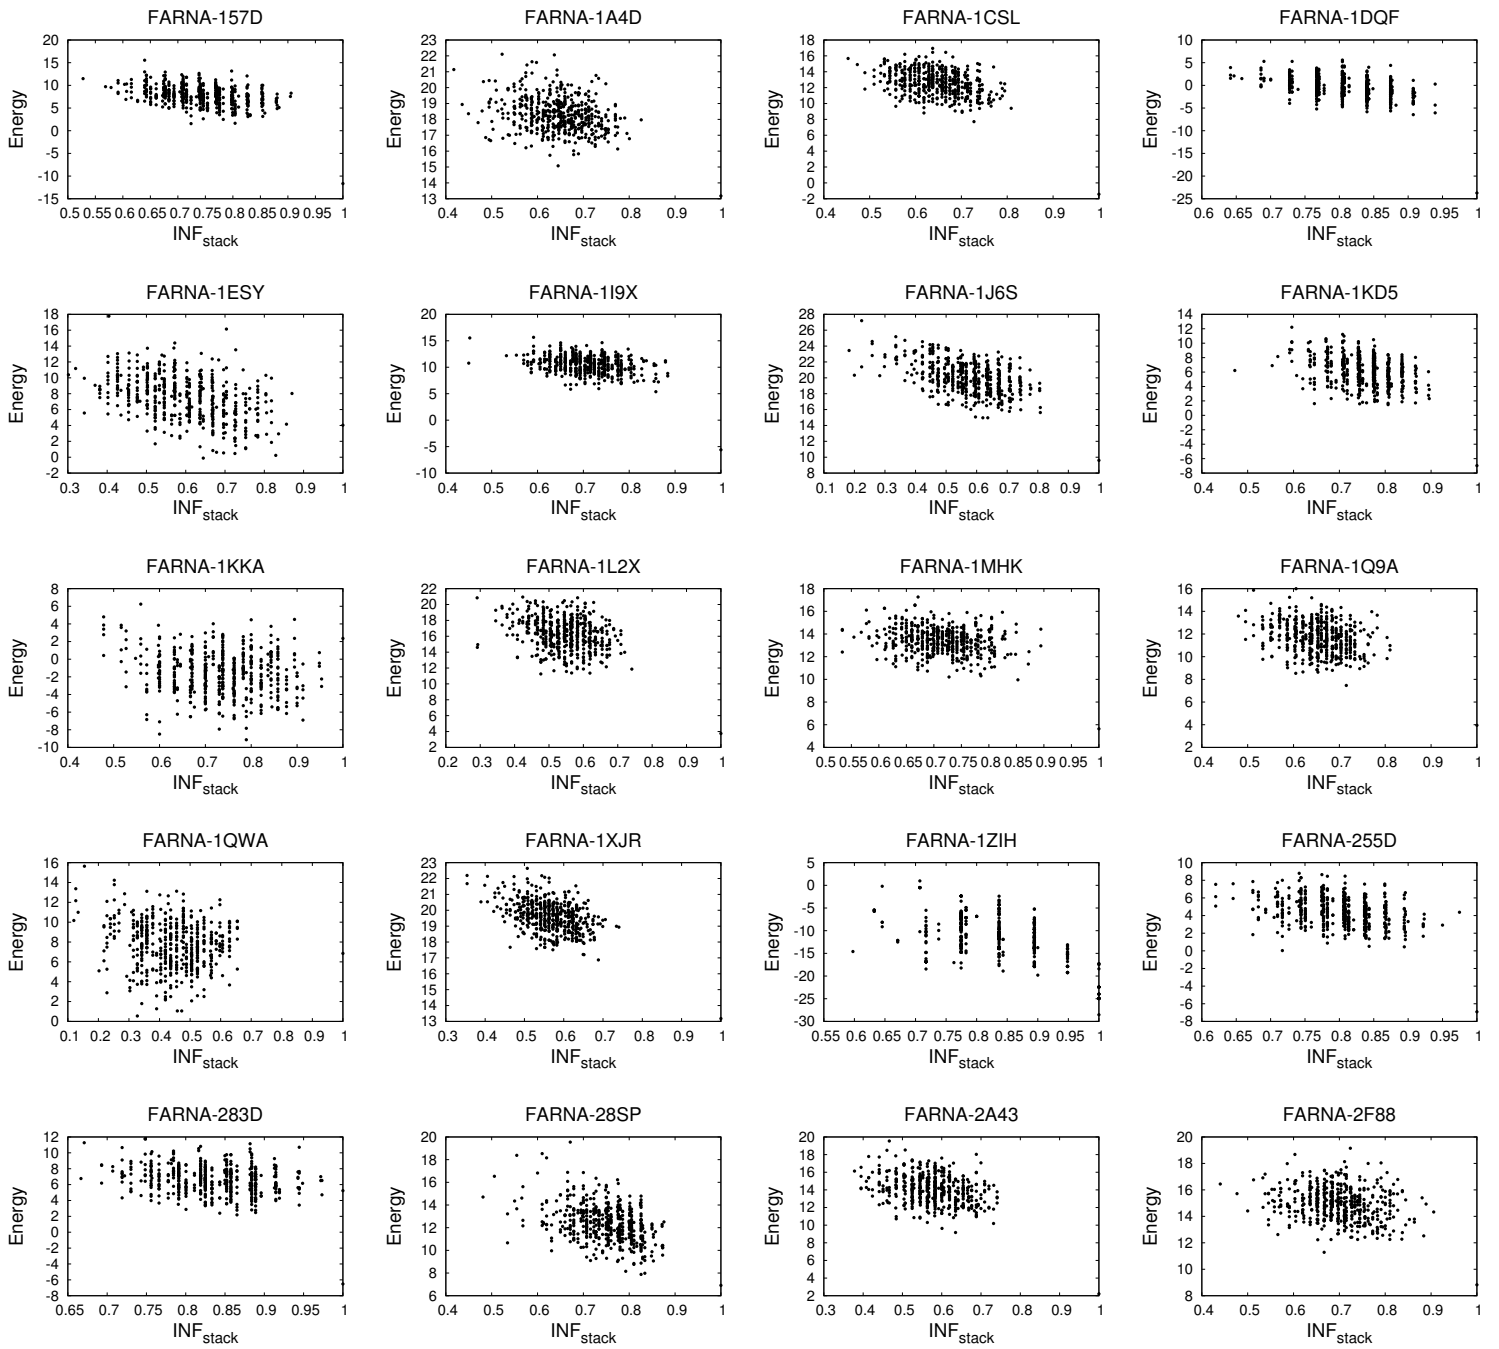

Supplement: supp_gkv141_nar-03468-met-z-2014-File009.pdf [file supp_gkv141_nar-03468-met-z-2014-File009.pdf]
